# Supplementary material for: Midbrain dopamine oxidation links ubiquitination of glutathione peroxidase 4 to ferroptosis of dopaminergic neurons
Source: JCI journal article supplement (doi:10.1172/jci165228), 2023-05-15
Supplement: sd1 [file 1]

1 *Supplementary material*

2 **Midbrain dopamine oxidation links ubiquitination of glutathione**  
3 **peroxidase 4 to ferroptosis of dopaminergic neurons**

4  
5 Jie Sun <sup>a,1</sup>, Xiao-Min Lin <sup>a,1</sup>, Dan-Hua Lu <sup>a,1</sup>, Meng Wang <sup>1</sup>, Kun Li <sup>1</sup>, Sheng-  
6 Rong Li <sup>1</sup>, Zheng-Qiu Li <sup>1</sup>, Cheng-Jun Zhu <sup>1</sup>, Zhi-Min Zhang <sup>1</sup>, Chang-Yu Yan <sup>1</sup>,  
7 Ming-Hai Pan <sup>1</sup>, Hai-Biao Gong <sup>1</sup>, Jing-Cheng Feng <sup>1</sup>, Yun-Feng Cao <sup>3</sup>, Feng  
8 Huang <sup>5</sup>, Wan-Yang Sun <sup>1</sup>, Hiroshi Kurihara <sup>1</sup>, Yi-Fang Li <sup>1</sup>, Wen-Jun Duan<sup>\*,1</sup>,  
9 Gen-Long Jiao<sup>\*,1</sup>, Li Zhang<sup>\*,4</sup>, Rong-Rong He<sup>\*,1,2,5</sup>

- 10  
11 1. The First Affiliated Hospital of Jinan University/Guangdong Engineering  
12 Research Center of Chinese Medicine & Disease  
13 Susceptibility/International Cooperative Laboratory of Traditional Chinese  
14 Medicine Modernization and Innovative Drug Development of Chinese  
15 Ministry of Education (MOE)/Guangdong Province Key Laboratory of  
16 Pharmacodynamic Constituents of TCM and New Drugs Research/The  
17 Sixth Affiliated Hospital of Jinan University, Jinan University, Guangzhou  
18 510632, China  
19 2. State Key Laboratory of Quality Research in Chinese Medicine, Macau  
20 University of Science and Technology, Macau, China.  
21 3. Shanghai Institute for Biomedical and Pharmaceutical Technologies, NHC  
22 Key Laboratory of Reproduction Regulation, Shanghai 200032, China  
23 4. Key Laboratory of CNS Regeneration (Ministry of Education), Guangdong-  
24 Hong Kong-Macau Institute of CNS Regeneration, Jinan University,  
25 Guangzhou 510632, China  
26 5. School of Chinese Materia Medica and Yunnan Key Laboratory of Southern  
27 Medicinal Utilization, Yunnan University of Chinese Medicine, Kunming  
28 650500, China

29  
30 <sup>a</sup>Contributed equally to this work.

31 \*Corresponding to:

32 Email: rongronghe@jnu.edu.cn, Tel & Fax: +86-20-85221559,  
33 zhangli@jnu.edu.cn, jiaogenlong@163.com, duanwj@jnu.edu.cn.

34  
35 The authors declare no conflict of interest.

1

2 **Content**

3 1. Supplementary figures and figure legends, Page 1-16;

4 2. Supplementary methods, Page 17-22;

5 3. Lists of resources, Page 23-26;

6 4. Reference, Page 27.

7

1 **Supplementary figures and figure legends**

2 **Supplementary figure 1**

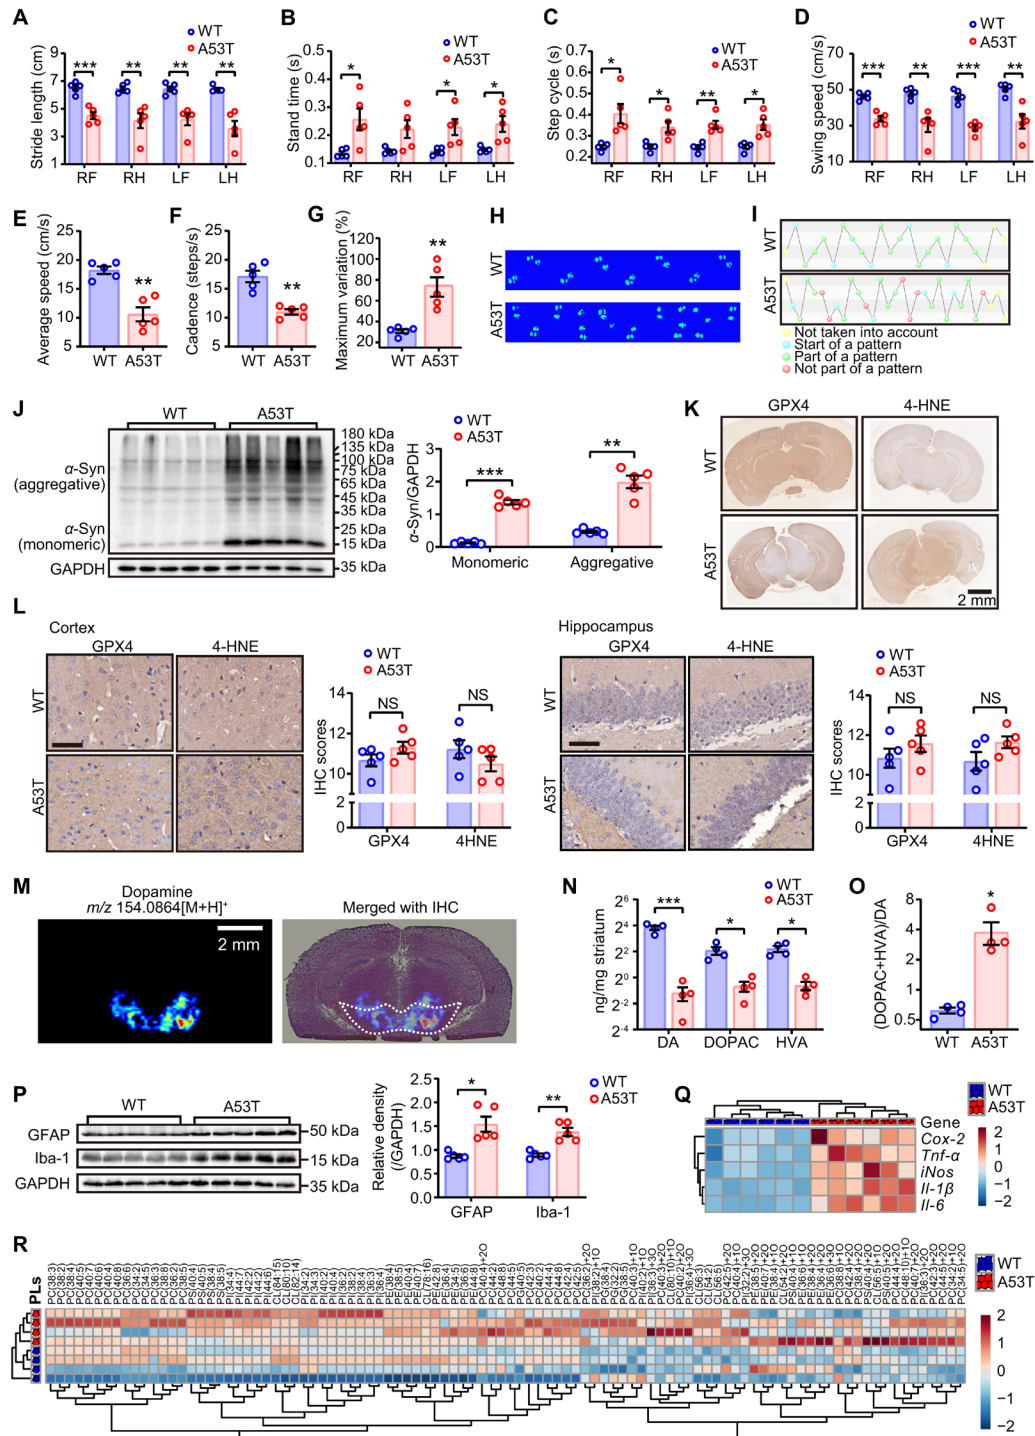

3

4 **Figure S1. PD progression is combined with phospholipid oxidation in**  
 5 ***SNCA*<sup>A53T</sup> transgene mice.** Disordered motor coordination of A53T mice  
 6 compared to WT mice was assessed by Catwalk gait analysis including the (A)  
 7 stride length, (B) stand time, (C) step cycle, (D) swing speed, (E) average

1 speed, **(F)** cadence and **(G)** maximum variation ( $n = 5$  mice each group). The  
2 gait pattern, referring to the order in which the mice complete a sequence of  
3 walking, was visualized as **(H)** footprint view and **(I)** footfall pattern. RF, right  
4 front. RH, right hind. LF, left front. LH, left hind. Green balls: normal pattern.  
5 Red balls: abnormal pattern. Blue balls: the beginning of a walking cycle. Yellow  
6 balls: data that were excluded from the test. **(J)**  $\alpha$ -Synuclein expression and  
7 aggregation was determined by Western blotting analysis ( $n = 5$  mice each  
8 group). **(K)** IHC of coronal brain sections labeled with GPX4 and 4-HNE  
9 antibodies and hematoxylin. **(L)** IHC GPX4 and 4-HNE in the cortex and  
10 hippocampus in A53T mice. IHC magnification (left) and IHC score (right).  
11 Scale bar: 50  $\mu$ m. **(M)** The dopamine (DA) in substantia nigra (dotted area) was  
12 detected by AFADESI-MSI assay in positive ion mode. Representative image  
13 was merged with H&E-stained coronal section. **(N-O)** The contents of DA and  
14 the metabolites 3,4-dihydroxyphenylacetic acid (DOPAC) and homovanillic acid  
15 (HVA) in striatum were determined by LC-MS, and the turnover rate of DA and  
16 the metabolites were calculated ( $n = 4$  mice each group). **(P)** The inflammation  
17 of midbrain was determined by Western blotting analysis displaying the  
18 expressions of GFAP and Iba-1 ( $n = 5$  mice each group). **(Q)** Inflammation-  
19 related genes were detected by quantitative real-time PCR assay and relative  
20 expressions were displayed as heatmap ( $n = 6$  mice each group). *Cox-2*,  
21 cyclooxygenase-2. *Tnf- $\alpha$* , tumor necrosis factor- $\alpha$ . *iNos*, inducible nitric oxide  
22 synthase. *Il-1 $\beta$* , interleukin-1 $\beta$ . *Il-6*, interleukin-6. **(R)** Data of phospholipids  
23 were extracted and displayed as heatmap ( $n = 4$  mice each group). PL,  
24 phospholipid. PC, phosphatidylcholine. PE, phosphatidylethanolamine. PI,  
25 phosphatidylinositol. PS, phosphatidylserine. CL, cardiolipin. All data represent  
26 mean  $\pm$  SEM. \* $p < 0.05$ , \*\* $p < 0.01$  and \*\*\* $p < 0.001$ , by independent-samples *t*-  
27 test.

28

1 Supplementary figure 2

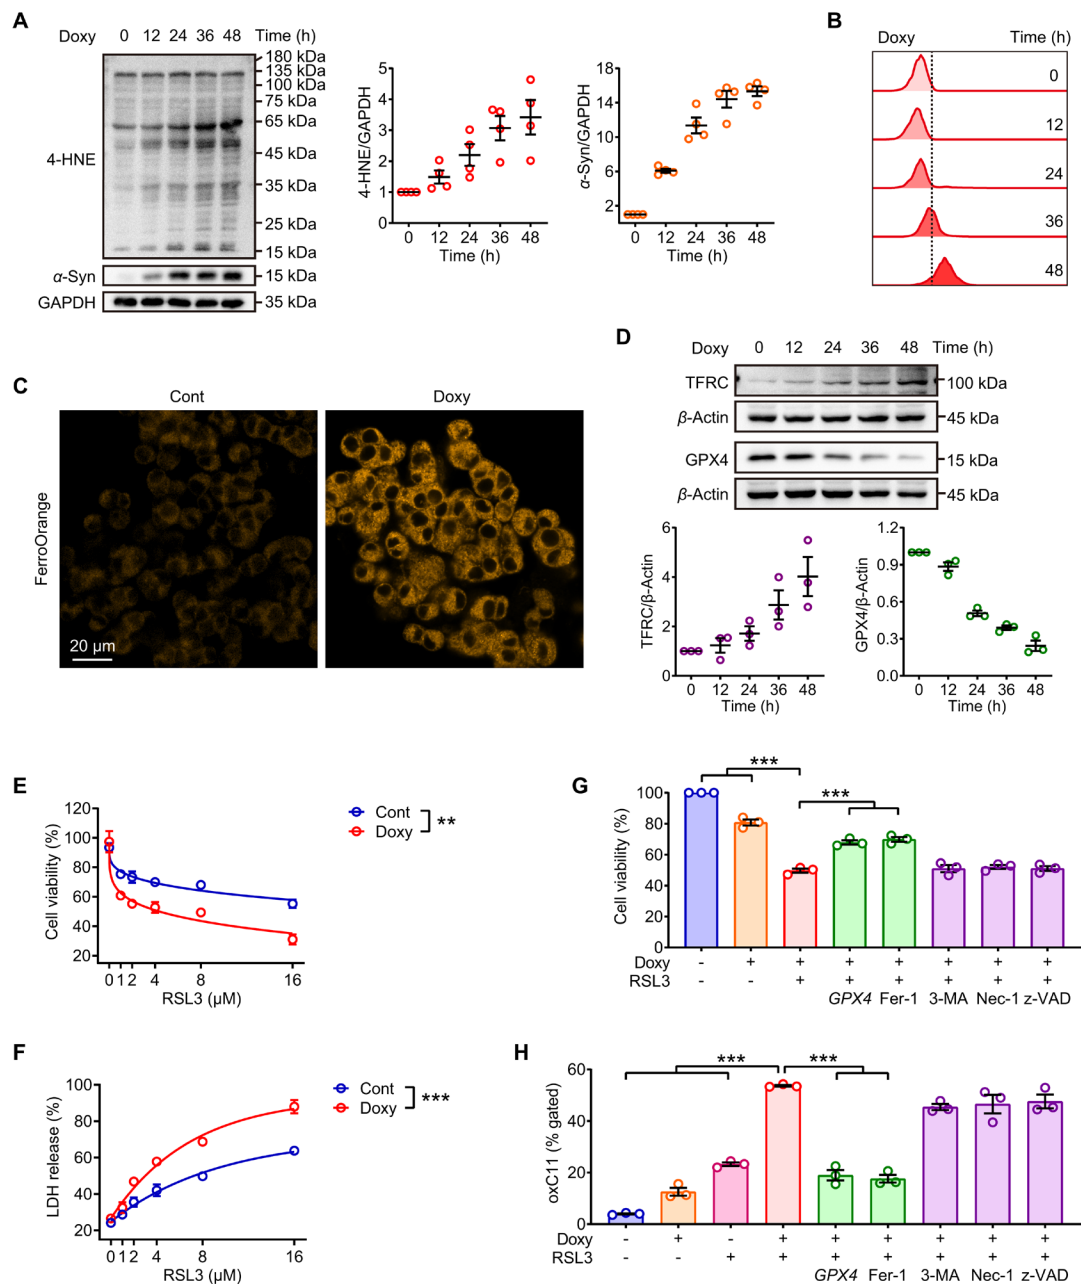

2

3 **Figure S2. α-Synuclein overexpression leads to lipid peroxidation and**  
 4 **ferroptotic susceptibility in PC12 cell line.** PC12 cell line carrying  
 5 doxycycline-inducible *SNCA*<sup>A53T</sup> were utilized for α-synuclein overexpression *in*  
 6 *vitro*. **(A)** Western blotting (left) and quantitative analysis (right) of 4-HNE and  
 7 α-synuclein expressions in PC12 cells treated with doxycycline for 12, 24, 36

1 and 48 hours ( $n = 4$  independent samples). **(B)** SNCA-overexpression-induced  
2 lipid peroxides were labelled with Liperfluo and measured by flow cytometry. **(C)**  
3 Cytoplasmic labile iron was stained by FerroOrange. **(D)** Western blotting  
4 (upper) and quantitative analysis (bottom) of TFRC and GPX4 expressions in  
5 PC12 cells treated with doxycycline for 12, 24, 36 and 48 hours. SNCA-  
6 overexpressed PC12 cells were treated with RSL3 (12.5  $\mu$ M) for 1, 2, 4, 8 and  
7 16 hours, and **(E)** cell viability was determined by MTT assay and **(F)** plasma  
8 membrane integrity was determined by LDH assay. \*\* $p < 0.01$  and \*\*\* $p < 0.001$ ,  
9 by two-way repeated measures ANOVA. SNCA-overexpressed PC12 cells  
10 were treated with indicated agents for 12 h. GPX4, plasmid expressing GPX4.  
11 Fer-1, ferrostatin-1, 10  $\mu$ M. 3-MA, 3-methyladenine, 10 mM. Nec-1, necrostatin-  
12 1, 5  $\mu$ M. z-VAD, z-VAD-FMK, 20  $\mu$ M. RSL3, 12.5  $\mu$ M. The **(G)** Cell viability was  
13 determined by MTT assay, and **(H)** lipid peroxides were labelled with ox-C11  
14 and determined by flow cytometry. All data represent mean  $\pm$  SEM ( $n = 3$   
15 independent samples). \*\* $p < 0.01$  and \*\*\* $p < 0.001$ , by one-way ANOVA with  
16 Bonferroni test.  
17

1 Supplementary figure 3

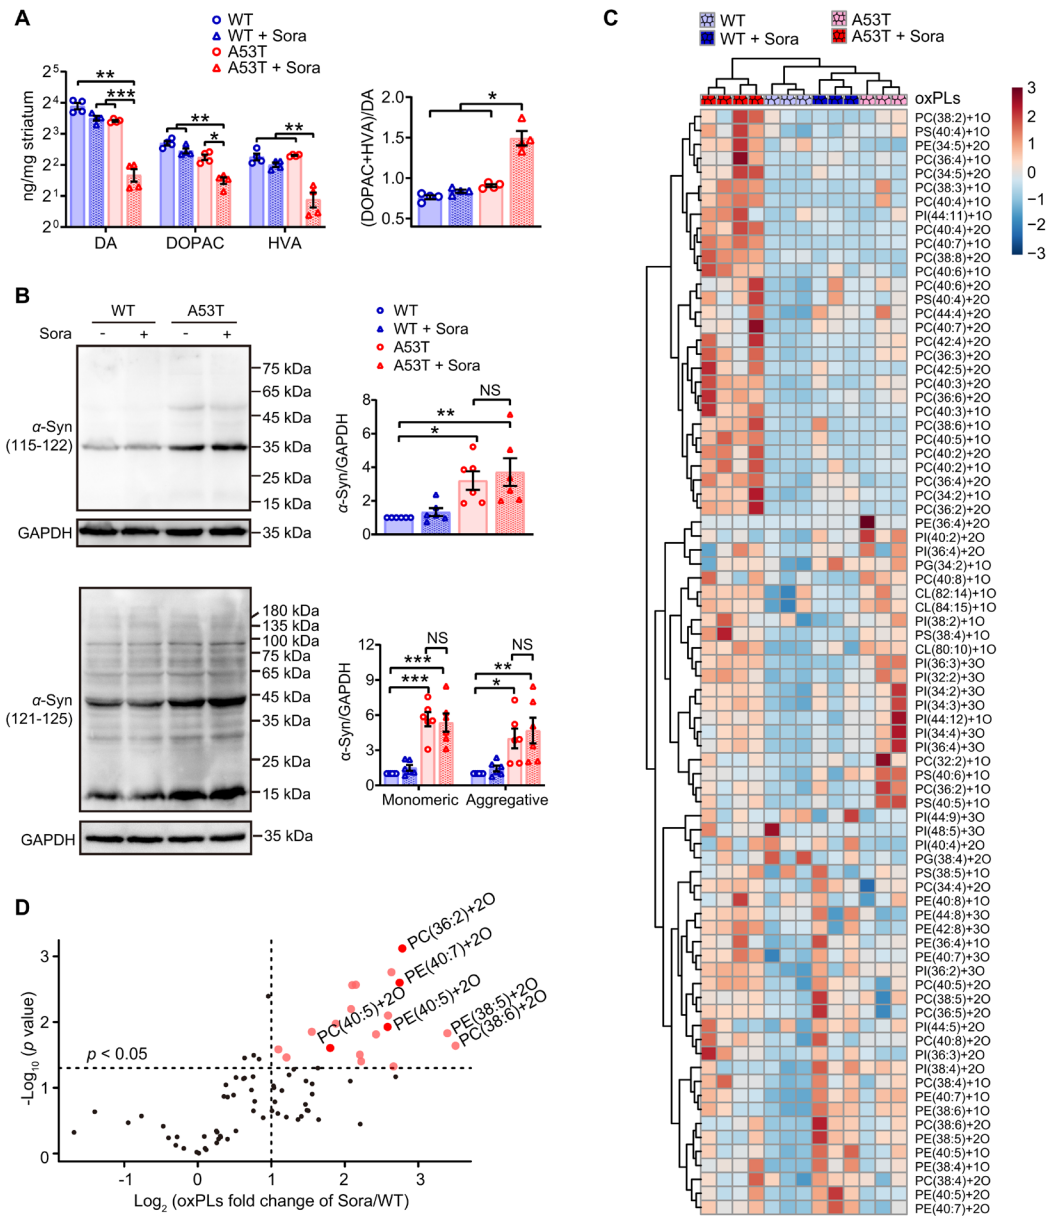

2

3 **Figure S3. Phospholipid peroxidation occurred downstream of**  
 4 **synucleinopathies.** A53T transgenic mice were treated with low-dose  
 5 sorafenib (Sora, 30 mg/kg as daily *i.p.*) for 2 weeks before measurements. (A)  
 6 The contents of DA and the metabolites DOPAC and HVA in striatum were  
 7 determined by LC-MS (left), and the turnover rate of DA and the metabolites

1 were calculated (right,  $n = 4$  mice each group).  $*p < 0.05$ ,  $**p < 0.01$  and  $***p <$   
2  $0.001$ , by one-way ANOVA with Dunnett T3. **(B)** Western blotting and  
3 quantitative analysis of  $\alpha$ -synuclein expression in midbrain ( $n = 6$  mice each  
4 group). The antibodies (ab27766 and sc-7011-R) reacts with an epitope located  
5 in the region encoded by amino acids 115-122 and 121-125 of  $\alpha$ -synuclein,  
6 respectively.  $*p < 0.05$ ,  $**p < 0.01$  and  $***p < 0.001$ , by one-way ANOVA with LSD  
7 post-*hoc* test. NS, not significant. Data of oxidized phospholipids were extracted  
8 and displayed as **(C)** heatmap and **(D)** volcano plots showing the fold changes  
9 (X-axis) vs significance (Y-axis, by *t*-test).  $n = 4$  mice in WT group, and 3 mice  
10 in the remaining three groups.

11



1 Supplementary figure 4

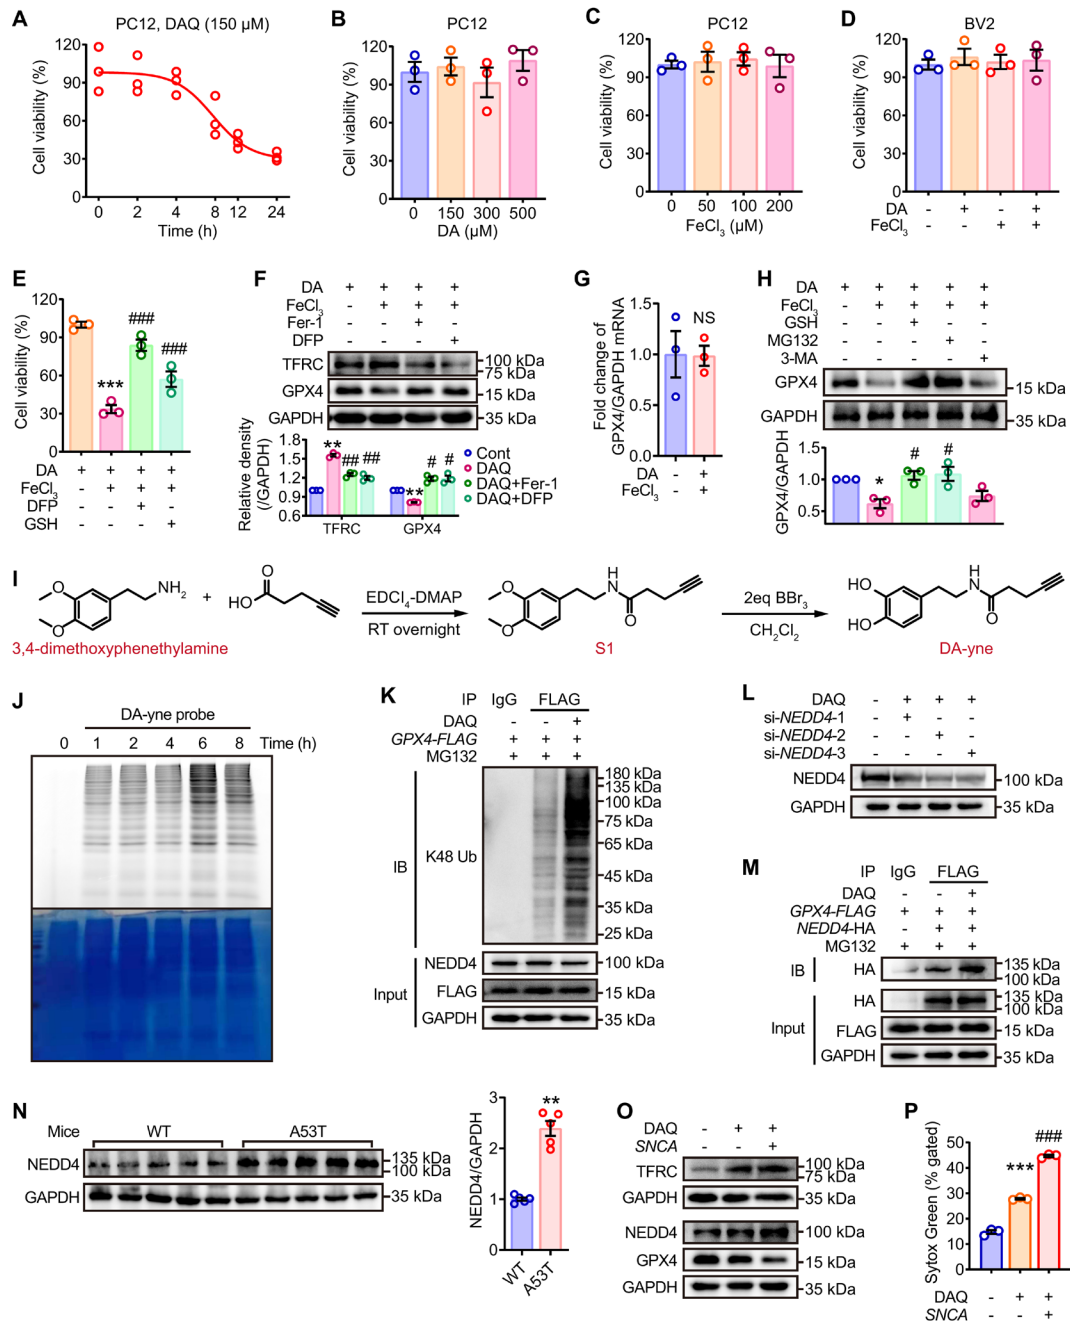

2

3 **Figure S4. Dopamine and  $\alpha$ -synuclein both contribute to NEDD4-mediated**  
 4 **GPX4 ubiquitin proteasome degradation. (A)** Cell viability was determined  
 5 by MTT assay in PC12 cells treated with dopamine quinone (DAQ, 150  $\mu$ M DA  
 6 mixed with 150  $\mu$ M FeCl<sub>3</sub>) time-dependently. Cell viability was unaffected in  
 7 PC12 cells treated with (B) DA or (C) FeCl<sub>3</sub> dose-dependently. (D) The viability

1 of BV-2 cells lacking DA-imported transporters was unaffected when treated  
2 with neither DA, FeCl<sub>3</sub>, nor DAQ. **(E)** Cell viability was determined by MTT  
3 assay in PC12 cells treated with indicated agents. **(F)** Western blotting (upper)  
4 and quantitative analysis (bottom) of TFRC and GPX4 expressions in PC12  
5 cells treated with indicated agents. **(G)** *Gpx4* gene expression was detected by  
6 quantitative real-time PCR assay. **(H)** Western blotting (upper) and quantitative  
7 analysis (bottom) of GPX4 expression in PC12 cells treated with indicated  
8 agents. DA, 150 μM. FeCl<sub>3</sub>, 150 μM. DFP, deferiprone, 100 μM. GSH,  
9 glutathione, 100 μM. Fer-1, ferrostatin-1, 10 μM. MG132, 10 μM. 3-MA, 3-  
10 methyladenine, 10 mM. **(I)** Schematic diagram of the synthesis of alkyne-  
11 containing DA probe (DA-yne). **(J)** Time-dependent labeling profiles of DA-yne  
12 probe with PC12 cells, and 6-h treatment was chosen for the subsequent  
13 experiments. **(K)** The K48-specific ubiquitination level of GPX4 and the  
14 expression of NEDD4 were examined by Western blotting-based co-  
15 immunoprecipitation (co-IP) using PC12 cells transfected with *FLAG*-tagged  
16 *GPX4* plasmid. **(L)** The efficacy of *NEDD4* siRNAs were validated in HEK293  
17 cells by Western blotting. **(M)** The interaction of GPX4 and NEDD4 was verified  
18 by Western blotting-based co-immunoprecipitation (co-IP) using HEK293 cells  
19 transfected with plasmids of *FLAG*-tagged *GPX4* and *HA*-tagged *NEDD4*. **(N)**  
20 Western blotting (left) and quantitative data (right) showed the NEDD4  
21 upregulation in the midbrain of A53T mice ( $n = 5$  mice each group). **(O)** Western  
22 blotting showed the upregulation of NEDD4 and TFRC, and the decline of  
23 GPX4 in DAQ-treated *SNCA*-overexpressed PC12 cells. **(P)** The cells with  
24 compromised membranes were penetrated by Sytox Green and determined by  
25 flow cytometry. All data represent mean  $\pm$  SEM (for cells,  $n = 3$  independent  
26 samples). \* $p < 0.05$ , \*\* $p < 0.01$  and \*\*\* $p < 0.001$  vs the control group, # $p < 0.05$ ,  
27 ## $p < 0.01$  and ### $p < 0.001$  vs the DAQ-treated cells, by one-way ANOVA with  
28 Bonferroni (for **E**, **H**, **P**), Dunnett T3 (for **F**) tests or independent-samples *t*-test  
29 (for **G**, **N**). NS, not significant.

1 Supplementary figure 5

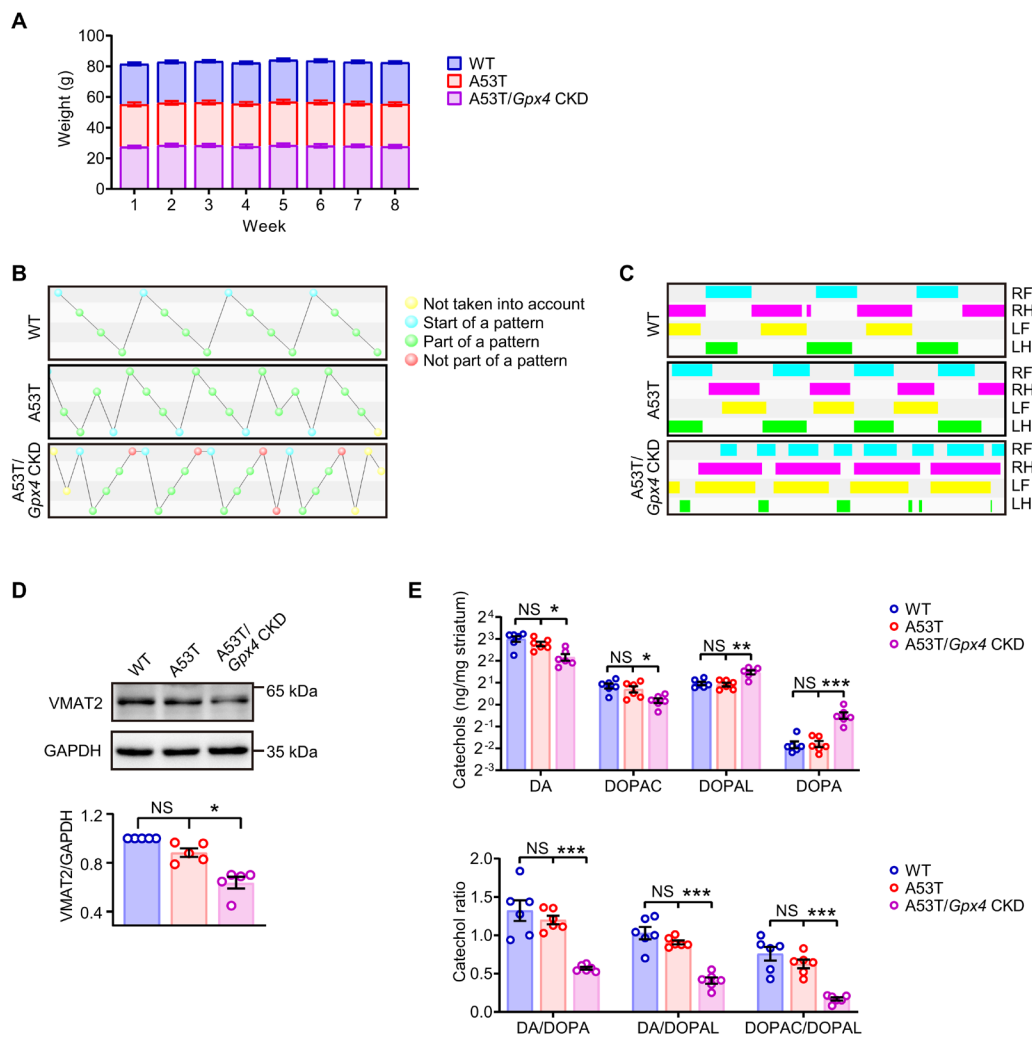

2

3 **Figure S5. Conditional knockdown of *Gpx4* in substantia nigra**  
 4 **accelerates the dysfunction of gait pattern in *SNCA*<sup>A53T</sup>/*Gpx4*<sup>+/flox</sup> double**  
 5 **transgenic mice. (A) Double hemizygous *SNCA*<sup>A53T</sup>/*Gpx4*<sup>+/flox</sup> mice were**  
 6 **obtained by cross-breeding *SNCA*<sup>A53T</sup> and *Gpx4*<sup>flox/flox</sup>, and were bilaterally**  
 7 **injected adeno-associated virus (AAV)-*Cre* into the substantia nigra to acquire**

1 a strain of A53T with conditional knockdown of *Gpx4* (CKD). No significant  
2 difference in the body weight of the mice of each strain was observed  
3 throughout the experiment.  $n = 10, 9, 8$  mice in WT, A53T, A53T/*Gpx4* CKD,  
4 respectively. **(B-C)** The gait pattern was visualized as footfall pattern and  
5 footprint length. Green balls: normal pattern. Red balls: abnormal pattern. Blue  
6 balls: the beginning of a walking cycle. Yellow balls: data that were excluded  
7 from the test. RF, right front. RH, right hind. LF, left front. LH, left hind. **(D)**  
8 Western blotting (upper) and quantitative analysis (bottom) of VMAT2  
9 expression in midbrain ( $n = 5$  mice each group). **(E)** Levels of catechol, and  
10 catechol ratios in striatum tissue obtained from *SNCA*<sup>A53T</sup>/*Gpx4*<sup>+/*flox*</sup> mice. ( $n =$   
11  $6$  mice each group). All data represent mean  $\pm$  SEM. \* $p < 0.05$ , \*\* $p < 0.01$  and  
12 \*\*\* $p < 0.001$ , by one-way ANOVA with Dunnett T3 (for **D**) or Tukey HSD (for **E**)  
13 test. NS, not significant.  
14

1 Supplementary figure 6

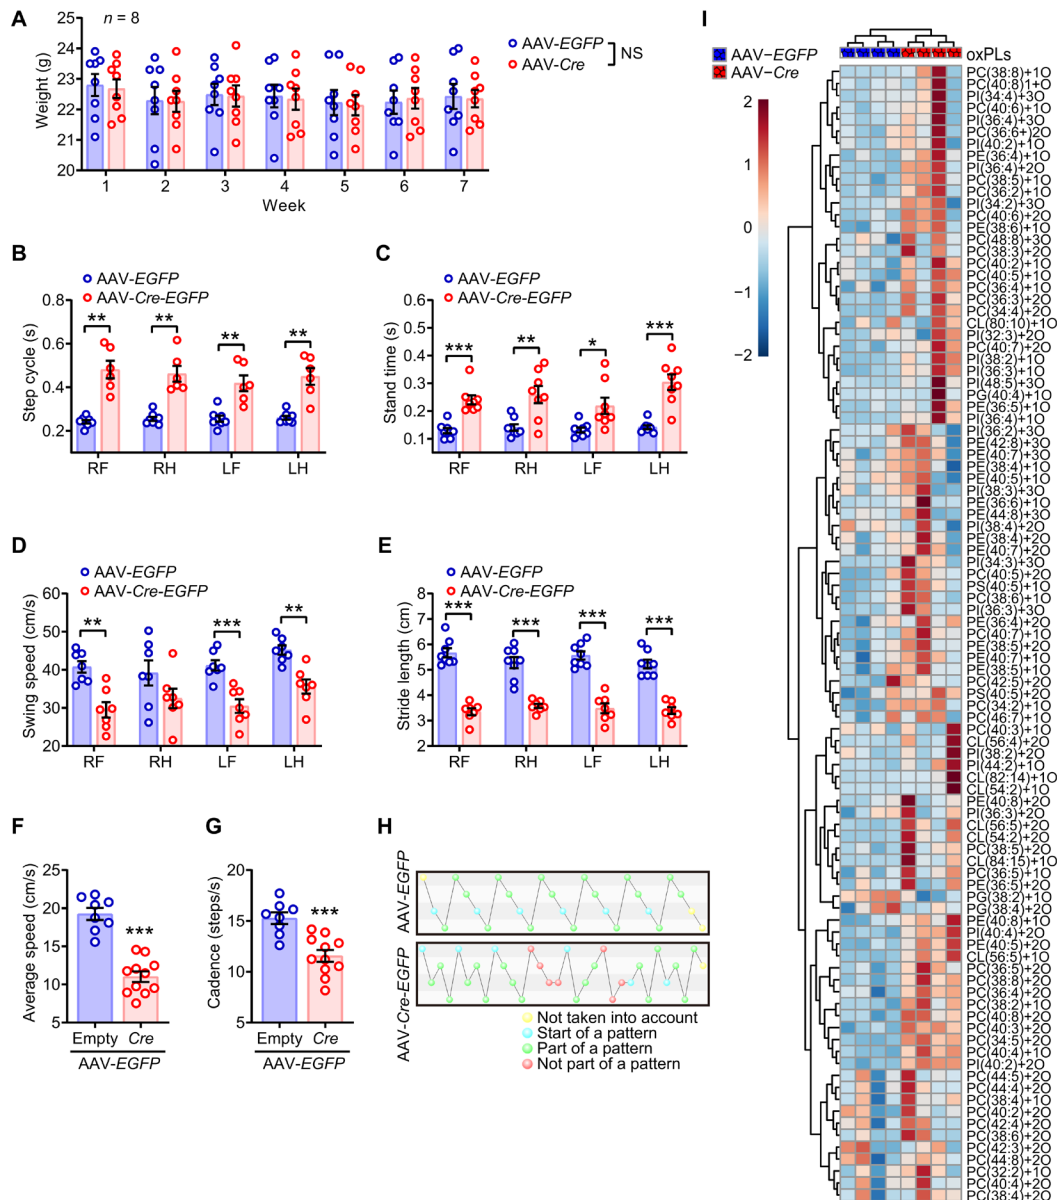

2

3 **Figure S6. Conditional knockdown of *Gpx4* in substantia nigra leads to the disordered gait pattern and phospholipid oxidation in *Gpx4*<sup>flox/flox</sup>**  
 4 **homozygous. (A)** *Gpx4*<sup>flox/flox</sup> homozygous were bilaterally injected AAV-Cre  
 5 into the substantia nigra which acquired a strain of conditional *Gpx4* knockdown  
 6 mice. No significant difference in the body weight of the mice of each strain was  
 7

1 observed throughout the experiment ( $n = 8$  mice each group). Disordered motor  
2 coordination of *Gpx4* CKD mice was assessed by Catwalk gait analysis  
3 including the **(B)** step cycle ( $n = 8$  in *EGFP* group,  $n = 6$  mice in *Cre* group), **(C)**  
4 stand time ( $n = 8$  mice each group), **(D)** swing speed ( $n = 7$  mice each group),  
5 **(E)** stride length ( $n = 8$  in *EGFP* group,  $n = 7$  mice in *Cre* group), **(F)** average  
6 speed ( $n = 8$  in *EGFP* group,  $n = 11$  mice in *Cre* group) and **(G)** cadence ( $n = 8$   
7 in *EGFP* group,  $n = 11$  mice in *Cre* group). **(H)** The gait pattern was visualized  
8 as footfall pattern. RF, right front. RH, right hind. LF, left front. LH, left hind.  
9 Green balls: normal pattern. Red balls: abnormal pattern. Blue balls: the  
10 beginning of a walking cycle. Yellow balls: data that were excluded from the test.  
11 **(I)** Data of oxidized phospholipids were extracted and displayed as heatmap ( $n$   
12 = 4 mice each group).

13

1 Supplementary figure 7

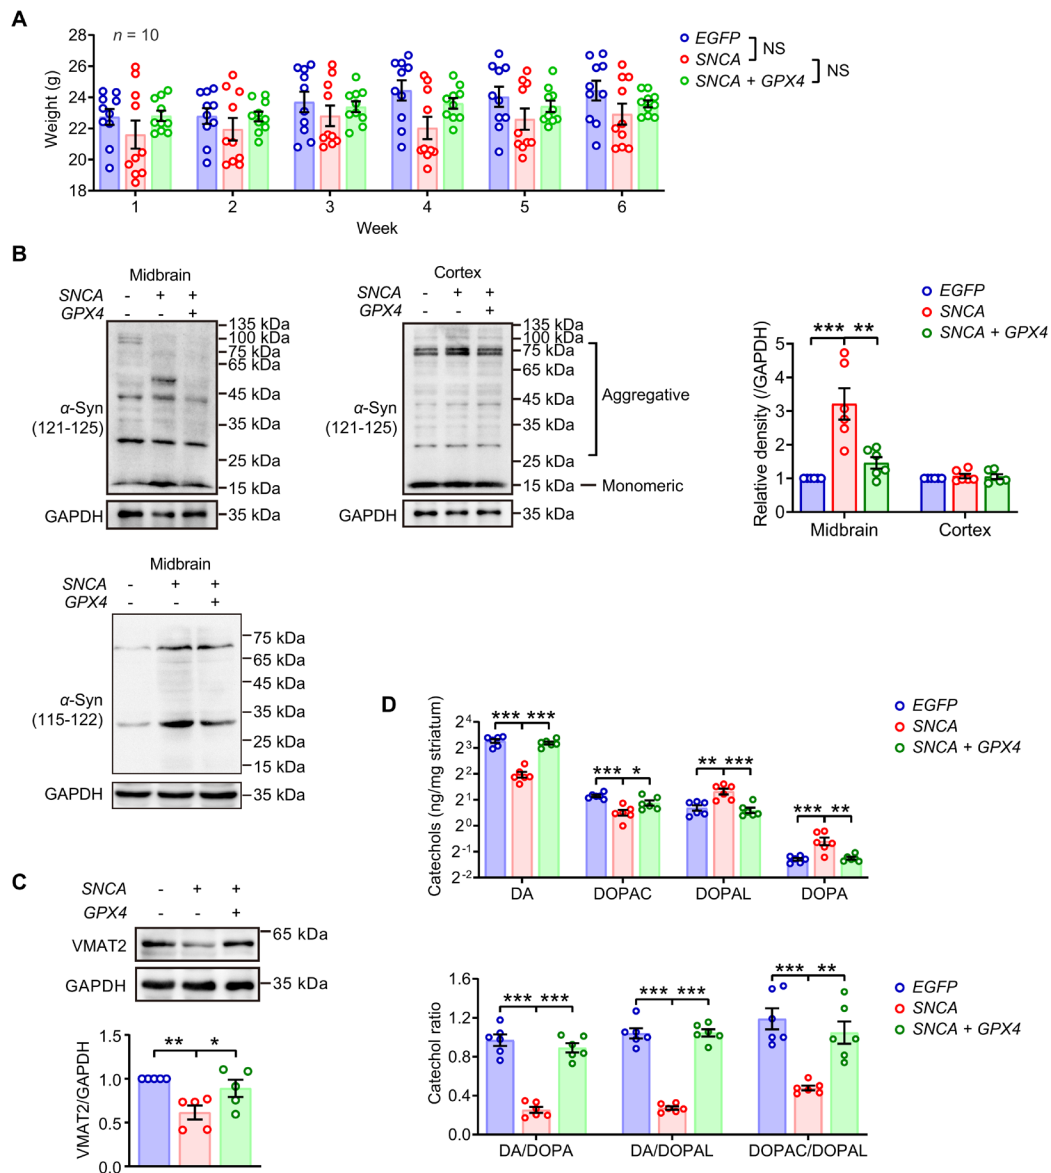

2

3 **Figure S7. GPX4 replenishment alleviates synucleinopathy in mice**  
 4 **overexpress SNCA. (A)** WT mice were unilaterally injected AAV-loaded human  
 5 **SNCA** or **GPX4** into the substantia nigra. No significant difference in the body  
 6 weight of the mice of each strain was observed throughout the experiment ( $n =$   
 7 10 mice each group). **(B)**  $\alpha$ -Synuclein expression and aggregation was

1 reversed in midbrain, while unaffected in cortex, as quantified by Western  
2 blotting analysis ( $n = 6$  mice each group). The antibodies (ab27766 and sc-  
3 7011-R) reacts with an epitope located in the region encoded by amino acids  
4 115-122 and 121-125 of  $\alpha$ -synuclein, respectively.  $**p < 0.01$  and  $***p < 0.001$ ,  
5 by one-way ANOVA with LSD post-*hoc* test. **(C)** Western blotting (upper) and  
6 quantitative analysis (bottom) of VMAT2 expression in midbrain ( $n = 5$  mice  
7 each group). **(D)** Levels of catechol and catechol ratios in striatum tissue  
8 obtained from AAV-loaded *SNCA* or *GPX4* mice ( $n = 6$  mice each group). All  
9 data represent mean  $\pm$  SEM.  $*p < 0.05$ ,  $**p < 0.01$  and  $***p < 0.001$ , by one-way  
10 ANOVA with Tukey HSD test. NS, not significant.

11



1 **Supplementary methods**

2 **Pole test**

3 Motor coordination was assessed by the time the mouse descends from  
4 the top of the pole to the landing of the two front paws. A 2 cm diameter ball  
5 was fixed on the top of an iron frame with a length of 50 cm and a diameter of  
6 1 cm. The pole was covered with two layers of gauze to prevent it from slipping.  
7 Mice were trained 3 days ahead of the experiment. After training, the mouse  
8 was placed head-up on the ball-like shape, mice climbed to the bottom pole  
9 time was recorded, with a maximum observation time of 60 s. The test was  
10 repeated for 5 times to obtain the average value. To avoid interference, the  
11 experiment was carried out in a quiet environment.

12

13 **Rotarod test**

14 Mice were first trained to stay on the rod of the rotarod (Ugo Basile S.R.L.,  
15 Gemonio VA, Italy) 3 days prior to the actual test and the speed was set to  
16 evenly accelerate from 5 rpm to 30 rpm in 300 s. After training, each mouse  
17 was repeatedly measured 5 times at the accelerated speed. Between each trial,  
18 there was an interval of 30 min break for the mice. The experiment was  
19 performed as follows: mice were placed on the rod and initially maintained at a  
20 constant speed of 5 r/min, allowing the mice to maintain a good balance on their  
21 respective runways for 15 s. The rod speed was increased from 5 r/min to 30  
22 r/min within 300s until the mouse fell from the rod within the measurement time  
23 limit. The average on-rod time of three trials was reported. All tests and  
24 measurements were performed on the same day. Experiments were conducted  
25 in a quiet environment to avoid interference.

26

27 **Gait analysis**

28 To assess detailed functional changes in gait, gait analysis was performed  
29 using the CatWalk™ XT (Noldus Information Technology, Wageningen, The  
30 Netherlands), and the parameters were then calculated using the CatWalk XT  
31 software package. Three days before the test, the mice were trained to relieve  
32 stress. The experiment process is as follows: mice passed through the glass  
33 corridor, and the fluorescent lights illuminated the corridor, allowing the charge

1 coupled device (CCD) camera below to capture images of the footprint. Repeat  
2 the actual test until three consecutive uninterrupted runs were recorded. All  
3 tests and measurements were performed on the same day. Experiments were  
4 conducted in a quiet environment to avoid interference.

### 6 **TH, GPX4 or 4-HNE staining of brain section**

7 GTVision™ Anti-Mouse/Rabbit Universal Immunohistochemistry Kit  
8 (GenTech Biotechnology, Shanghai, China) was applied for observation of  
9 dopaminergic neurons. Mice were anesthetized with 3% isoflurane immediately  
10 after the behavior tests and were intracardially perfused with saline first, then  
11 with 4% paraformaldehyde in 0.1 M phosphate buffer (pH 7.4). Whole brains  
12 were immersed in 4% paraformaldehyde at 4 °C for 24 h, embedded with  
13 paraffin and cut into 5 µm-sections. After antigen retrieval, the sections were  
14 blocked in 10% 0.1 M normal goat serum and incubated with primary mouse  
15 antibodies overnight at 4 °C. After labeling with secondary antibody for 2 h at  
16 room temperature, the sections were stained with DAB and hematoxylin (for  
17 IHC), or with DAPI (for immunofluorescence), before observed under a  
18 microscope (for IHC, Olympus, Tokyo, Japan), or confocal microscope (for  
19 immunofluorescence, ZEISS, Germany). For IHC, the expression level of GPX4  
20 and 4-HNE proteins was independently assessed by 2 pathologists who were  
21 blind to the data, based on the proportion and intensity of positive cells  
22 determined in 5 microscopic 40 × fields per mouse. Scores representing the  
23 proportion of positively stained were assigned as follows: 0, < 10%; 1, 11-25%;  
24 2, 26-50%; 3, 51-75%; and 4, 76-100%. Next, an intensity score, which  
25 indicated the average intensity of positively stained cells, was assigned as  
26 follows: 0 (none), 1 (weak), 2 (intermediate), and 3 (strong) or 4 (significantly  
27 strong). The proportion and intensity scores were then multiplied to obtain a  
28 final score, which ranged 0 to 16.

### 30 **AFADESI-MSI assay for determination of DA in mouse brain**

31 AFADESI-MSI assay was conducted as described previously (1).The  
32 brains of mice were obtained after sacrifice, cut into 10 µm coronal sections at  
33 -20 °C on cryostat microtome, and the mounted onto microscope slides

1 (Thermo Fisher Scientific, Waltham, MA, USA). A set of adjacent tissue sections  
2 were fixed in acetone and then were stained with H&E for histological  
3 observation. Cryosections were dried in vacuum for 15 min before ( $\pm$ ) MSI  
4 analysis in full MS (100-1000 m/z) scan mode.

#### 6 **LC-MS analysis for determination of GSH**

7 Mice substantia nigra and striatum were collected on ice. Perchloric acid  
8 (0.1 M) was added according to the ratio of v/w = 10  $\mu$ L:1 mg. The tissue was  
9 homogenized on ice for 4 min, centrifuged at 13,000  $\times$  g for 15 min in a  
10 refrigerated centrifuge. The supernatant was transferred and passed through a  
11 filter to draw a 20  $\mu$ L sample for analysis. Analysis was conducted by LC-MS  
12 using a Triple Quad 4500 Mass Spectrometer (SCIEX). Analytes were  
13 separated on a C18 column (Acquity HSS T3, 1.8  $\mu$ m, 2.1 mm  $\times$  100 mm, 40  $^{\circ}$ C,  
14 Waters) at a flow rate of 0.4 mL/min on an Exion LC AD system. Gradient:  
15 solvent A (water) and solvent B (acetonitrile), each containing 0.1% formic acid  
16 (v/v): 0-1.2 min isocratic of 2% B, 1.2-2.5 min linear gradient of 2 to 60% B, 2.5-  
17 4.5 min linear gradient of 60% to 95% B, 4.5-5.0 min isocratic of 95% B, and  
18 5.0-6.5 min re-equilibration of 2% B. Positive and negative ion modes switching  
19 -4.5 kV; ion source temperature, 600  $^{\circ}$ C. Nebulizer gas and heater gas were  
20 set to 55 psi, and curtain gas was set to 30 abr. Data acquisition and processing  
21 were carried out using Analyst 1.6.2 software (SCIEX).

#### 23 **LC-MS analysis for determination of DA and metabolite**

24 Mice substantia nigra and striatum were collected on ice. Perchloric acid  
25 (0.1 M) was added according to the ratio of v/w = 10  $\mu$ L:1 mg. The tissue was  
26 homogenized on ice for 4 min, centrifuged at 13,000  $\times$  g for 15 min in a  
27 refrigerated centrifuge. The supernatant was transferred and passed through a  
28 filter to draw a 40  $\mu$ L sample for analysis. Analysis was conducted by LC-MS  
29 using a Dionex UltiMate 3000 DGLC standard system (Thermo Fisher  
30 Scientific). Analytes were separated on a C18 column (Acquity HSS T3, 1.8  $\mu$ m,  
31 2.1 mm  $\times$  100 mm, 40  $^{\circ}$ C, Waters) at a flow rate of 0.3 mL/min on an Dionex  
32 UltiMate 3000 UHPLC system. Gradient: solvent A (water) and solvent B  
33 (acetonitrile), each containing 0.1% formic acid (v/v): 0-1 min isocratic of 2% B,

1 1-2 min linear gradient of 2 to 60% B, 2-3.5 min linear gradient of 60% to 95%  
2 B, 3.5-4.5 min isocratic of 95% B, and 4.5-10.0 min re-equilibration of 0% B.  
3 Positive ion modes was +3.0 kV and negative ion modes was -2.8 kV. Capillary  
4 temperature was 350 °C. The S-lens Rf level was 65, and curtain gas was set  
5 to 30 arb. Data acquisition and processing were carried out using Analyst 1.6.2  
6 software (SCIEX).

7

### 8 **MTT assay**

9 Cells were dispensed in 96-well plate at a density of  $1 \times 10^5$  cells per well.  
10 After 24 h incubation, cells were treated with the tested reagents for the  
11 indicated periods of time and stained with MTT. Optical density was measured  
12 using an ELISA reader (Thermo Fisher Scientific, Waltham, MA, USA).

13

### 14 **LDH assay**

15 Tests were conducted according to the manufacturer's instructions  
16 (Nanjing Jiancheng Bioengineering Institute, Nanjing, China). Optical density  
17 was measured using an ELISA reader (Thermo Fisher Scientific).

18

### 19 **Liperfluo assay**

20 Cells were dispensed in dishes at a density of  $5 \times 10^5$  cells. After treatment,  
21 cells were incubated with Liperfluo (DojinDo, Kumamoto, Japan) for 30 min at  
22 37 °C. Then the cells were collected for analysis in a BD FACSCanto II flow  
23 cytometer. The excitation and emission wavelengths are 524 nm and 535 nm,  
24 respectively.

25

### 26 **Iron staining**

27 Cells were dispensed in dishes at a density of  $5 \times 10^5$  cells. After treatment,  
28 cells were incubated with FerroOrange (DojinDo) for 30 min at 37 °C. Then the  
29 cells were imaged using a ZEISS LSM 800 confocal laser scanning microscope  
30 (Carl Zeiss, Oberkochen, Germany).

31

### 32 **LC-MS/MS-based phospholipidomics analysis**

33 Phospholipids were separated by a Dionex UltiMate 3000 DGLC standard

1 system (Thermo Fisher Scientific) at a flow rate of 0.2 mL/min on normal-phase  
2 column (Phenomenex Luna Silica, 3  $\mu$ m, 150  $\times$  2.0 mm, Danaher Corporation,  
3 Washington DC, USA). The column temperature was maintained at 35  $^{\circ}$ C. The  
4 mobile phase consisted of 10 mM ammonium formate in  
5 propanol/hexane/water (285:215:5, v/v/v, solvent A) and 10 mM ammonium  
6 formate in propanol/hexane/water (285:215:40, v/v/v, solvent B). The linear  
7 gradient conditions were as follows: 0 min, 10% B; 20 min, 32% B; 30 min, 70%  
8 B; 32 min, 100% B; 58 min, 100% B; 60 min, 10% B; 75 min, 10% B. The  
9 injection volume was 2  $\mu$ L.

10 MS/MS analysis of phospholipids was performed on a Q-Exactive Hybrid  
11 Quadrupole-Orbitrap mass spectrometer (Thermo Fisher Scientific). Analysis  
12 was performed in full MS negative mode at resolution setting of 70,000 and  
13 data-dependent-MS/MS mode at resolution setting of 17,500. For MS, the scan  
14 range was 400-1,800 m/z and the maximum ion injection time was 600 ms  
15 using 1 microscan per MS scan. For MS/MS, high energy collision induced  
16 dissociation (HCD) analysis was performed with the collision energy set to 24  
17 eV and the maximum ion injection time of 200 ms. The inclusion list included all  
18 species of phospholipids and their oxidized/deuterated products. An isolation  
19 window of 1.0 Da was set for the MS and MS/MS scans. Capillary spray voltage  
20 was 3.0 kV, and capillary temperature was 320  $^{\circ}$ C. The S-lens Rf level was 60.

21

## 22 ***In Situ and in vitro* proteome labeling**

23 Cells were dispensed in dishes at a density of  $5 \times 10^5$  cells. After treatment,  
24 cells were incubated with 2 mL probe-containing fresh medium for 6 h. Then  
25 the cells were treated with RIPA lysis and extraction buffer containing 2.5%  
26 Chaps and phosphatase inhibitor, and then lysed with sonication on ice. The  
27 protein concentrations were determined by using the BCA protein assay and  
28 diluted to 1 mg/mL with PBS. A freshly pre-mixed click chemistry reaction  
29 cocktail was added (50  $\mu$ M TAMRA- $N_3$  from 25 mM stock solution in DMSO,  
30 100  $\mu$ M TBTA from 50 mM stock solution in DMSO, 1 mM TCEP from 1 M stock  
31 solution in deionized water, and 1 mM  $CuSO_4$  from 1 M stock solution in  
32 deionized water. All the stock solutions above were freshly prepared). The  
33 reaction was further incubated for 2 h prior to addition of pre-chilled acetone (-

1 20 °C). The precipitated proteins were subsequently collected by centrifugation  
2 (14,000 × *g* for 10 min at 4 °C) and washed twice with 1 mL of prechilled acetone.  
3 The samples were dissolved in 1 × SDS loading buffer and heated for 15 min  
4 at 95 °C. The proteins were separated by a 10% SDS-PAGE gel and then  
5 visualized by in-gel fluorescence scanning (Typhoon FLA 9500, GE Healthcare,  
6 Chicago, IL, USA).

7

1 ***Lists of resources***

2

3 **Table 1. List of agents**

| <b>Category</b>                        | <b>Company</b>           | <b>Product No.</b> |
|----------------------------------------|--------------------------|--------------------|
| <b><i>Chemicals</i></b>                |                          |                    |
| RSL3                                   | Selleckchem              | S8155              |
| Ferrostatin-1 (Fer-1)                  | Selleckchem              | S7243              |
| Erastin                                | Selleckchem              | S7242              |
| Doxycycline hydrochloride              | Sigma                    | D9891-1G           |
| Sorafenib                              | Meilunbio                | MB1666             |
| MTT                                    | Sigma                    | M2128-5G           |
| DA standard                            | Sigma                    | H8502              |
| Cycloheximide (CHX)                    | Selleck                  | S7418-200 mg       |
| MG132                                  | MedChemExpress           | HY-13259-25 mg     |
| Trifluoroacetic acid (TFA)             | ACMEC                    | T74920-500 mL      |
| Urea                                   | Macklin                  | U820349            |
| Azide-PEG3-biotin conjugate            | TCI                      | A2523-100mg        |
| NeutrAvidin agarose                    | Thermo Fisher Scientific | 29202              |
| TCEP                                   | Macklin                  | T917415            |
| TBTA                                   | RHAWN                    | R055315            |
| BCA color developing fluid             | Thermo Fisher Scientific | SLZ60212           |
| <b><i>Fluorogenic dyes</i></b>         |                          |                    |
| Liperfluo                              | Dojindo                  | L248               |
| C11 Bodipy                             | Invitrogen               | D3861              |
| SYTOX Green                            | Thermo Fisher Scientific | S7020              |
| FerroOrange                            | DOJINDO                  | F374               |
| DAPI                                   | Beyotime                 | C1002              |
| <b><i>Critical Commercial kits</i></b> |                          |                    |
| Iron Assay Kit                         | Abcam                    | ab83366            |
| DAB color development kit              | Gene Tech                | GK347010           |
| MDA assay kit                          | Beyotime                 | S0131              |
| Reverse transcription kit              | TransGen                 | AT311-03           |
| SYBR Green qPCR Mix                    | TransGen                 | AQ141-01           |
| Hematoxylin and eosin staining kit     | Beyotime                 | C0105              |
| LDH cytotoxicity assay kit             | Beyotime Biotechnology   | C0017              |
| <b><i>Antibodies</i></b>               |                          |                    |

|                                  |                          |             |
|----------------------------------|--------------------------|-------------|
| Rabbit anti-GPX4                 | Abcam                    | ab125066    |
| Rabbit anti-4-HNE                | Abcam                    | ab46545     |
| Rabbit anti- $\alpha$ -synuclein | Abcam                    | Ab27766     |
| Rabbit anti- $\alpha$ -synuclein | Santa Cruz Biotechnology | SC-7011-R   |
| Rabbit anti-TH                   | Abcam                    | ab112       |
| Rabbit anti-TFRC (CD71)          | Proteintech              | 10084-2-AP  |
| Rabbit anti-NEDD4                | Bioss                    | bs-7877R    |
| Rabbit anti-Ubiquitin            | CST                      | 3933S       |
| Rabbit anti-VMAT2                | Abcam                    | ab259970    |
| Mouse anti-FLAG                  | Proteintech              | 66008-3-IG  |
| Rabbit anti-HA                   | Proteintech              | 51064-2-AP  |
| Mouse anti-GAPDH                 | FuDe                     | FD0063      |
| Goat Anti-Rabbit IgG HCS         | Abkine                   | A25222-1    |
| Goat anti mouse-HRP              | FuDe                     | FDM007      |
| Goat anti rabbit-HRP             | FuDe                     | FDR007      |
| <b>Others</b>                    |                          |             |
| TritonX-100                      | Sigma                    | 900502      |
| PBCAG-eGFP                       | Addgene                  | 40973       |
| RIPA lysis buffer                | Beyotime                 | P0013C      |
| Trizol                           | Invitrogen               | 15596018    |
| DMEM basal medium                | Gibco                    | C11995500BT |
| Horse serum (HS)                 | Gibco                    | 26050088    |
| Fetal bovine serum (FBS)         | PAN                      | P30-3302    |

1

2 **Table 2. List of AAVs, siRNAs and plasmids**

| Category                                               | Company                                 |
|--------------------------------------------------------|-----------------------------------------|
| rAAV-hSyn-CRE-EGFP-WPRE-hGH polyA<br>(MK854762.1)      | BrainVTA (Wuhan, China)                 |
| AAV-hsyn-hGPX4-3flag-P2A-EGFP-WPRE-PA<br>(NM_002085.5) | BrainVTA (Wuhan, China)                 |
| AAV-SNCA (NM_001146054)                                | Taitool Bioscience (Shanghai,<br>China) |
| si-NEDD4                                               | RiboBio                                 |
| pcDNA3.1-NEDD4-HA                                      | Transsheep (Shanghai, China)            |
| pcDNA3.1-GPX4-FLAG                                     | BrainVTA (Wuhan, China)                 |
| pCMV-Ub-myc                                            | Transsheep (Shanghai, China)            |

3



1 **Table 3. List of siRNAs of *NEDD4***

| siRNA No.             | Target Sequence     |
|-----------------------|---------------------|
| si-r- <i>NEDD4</i> -1 | CCAAGAATGGAGAGACCAT |
| si-r- <i>NEDD4</i> -2 | GCTCGCAAACCTGTATCTT |
| si-r- <i>NEDD4</i> -3 | CCAGAGCACATACCTGCTT |

2

3 **Table 4. List of primer sequences used in RT-qPCR**

| Species | Primer name       | Sequence (5'→3')          |
|---------|-------------------|---------------------------|
| Rat     | <i>Gpx4</i> -F    | ATAAGAACGGCTGCGTGGTGAAG   |
|         | <i>Gpx4</i> -R    | TAGAGATAGCACGGCAGGTCCTTC  |
| Rat     | <i>Pla2g6</i> -F  | GCCGACTACCACTTCCATTTCATAC |
|         | <i>Pla2g6</i> -R  | GCTGATCGTTGGAGGCTGAGTTC   |
| Rat     | <i>Slc7a11</i> -F | CCATCATCATCGGCACCGTCATC   |
|         | <i>Slc7a11</i> -R | TACTCCACAGGCAGACCAGAACAC  |
| Rat     | <i>Alox15</i> -F  | AGCTGTGCAAGACGACTATGAACTG |
|         | <i>Alox15</i> -R  | CGGGACTGAAGAGAGGTAGGGAAG  |
| Rat     | <i>Alox5</i> -F   | ACCTATTCCTCCCTGTGCTTCCC   |
|         | <i>Alox5</i> -R   | CCACACGAGCAGTCCATCATCAC   |
| Rat     | <i>Tfrc</i> -F    | GTTCCCCGTTGTTGAGGCAGAC    |
|         | <i>Tfrc</i> -R    | GATGACTGAGATGGCGGAAACTGAG |
| Rat     | <i>Gapdh</i> -F   | AGTTCAACGGCACAGTCAAGGC    |
|         | <i>Gapdh</i> -R   | CGACATACTCAGCACCAGCATCAC  |
| Mus     | <i>Gpx4</i> -F    | ATAAGAACGGCTGCGTGGTGAAG   |
|         | <i>Gpx4</i> -R    | TAGAGATAGCACGGCAGGTCCTTC  |
| Mus     | <i>Pla2g6</i> -F  | CGGCCTGAACCAGGTAAACAA     |
|         | <i>Pla2g6</i> -R  | GTTGCAGCGGGCATTACAG       |
| Mus     | <i>Slc7a11</i> -F | CTATTTTACCACCATCAGTGCG    |
|         | <i>Slc7a11</i> -R | ATCGGGACTGCTAATGAGAATT    |
| Mus     | <i>Ptgs2</i> -F   | TGCACTATGGTTACAAAAGCTGG   |
|         | <i>Ptgs2</i> -R   | TCAGGAAGCTCCTTATTTCCCTT   |

---

|     |                  |                          |
|-----|------------------|--------------------------|
| Mus | <i>Tfr</i> -F    | TCACACTCTCTCAGCTTTAGTG   |
|     | <i>Tfr</i> -R    | TGGTTTCTGAAGAGGGTTTCAT   |
| Mus | <i>Ncoa4</i> -F  | ACCAGCCTAGAGGTGTGGAGATTG |
|     | <i>Ncoa4</i> -R  | GTCCTGATGGTTCTGGGCAAGC   |
| Mus | <i>Alox15</i> -F | GGCTCCAACAACGAGGTCTAC    |
|     | <i>Alox15</i> -R | CCCAAGGTATTCTGACACATCC   |
| Mus | <i>Alox12</i> -F | TCCCTCAACCTAGTGCGTTTG    |
|     | <i>Alox12</i> -R | CCTCGGGAACGTGGAAGTC      |
| Mus | <i>Alox5</i> -F  | ACTACATCTACCTCAGCCTCATT  |
|     | <i>Alox5</i> -R  | GGTGACATCGTAGGAGTCCAC    |
| Mus | <i>Acsl4</i> -F  | CAATAGAGCAGAGTACCCTGAG   |
|     | <i>Acsl4</i> -R  | TAGAACCACTGGTGTACATGAC   |
| Mus | <i>Lpcat3</i> -F | CTACCCGTTGGCTCTGTTTTAC   |
|     | <i>Lpcat3</i> -R | TGAAGCACGACACATAGCAAG    |
| Mus | <i>Dmt1</i> -F   | TACCTAGACCCAGGAAACATCG   |
|     | <i>Dmt1</i> -R   | CACTCCAAGTCTCGCTGCAA     |
| Mus | <i>Gapdh</i> -F  | AAGAAGGTGGTGAAGCAGG      |
|     | <i>Gapdh</i> -R  | GAAGGTGGAAGAGTGGGAGT     |

---

1

2

3

1 **Author contributions**

2 JS conducted most of the in vitro experiments and acquired and analyzed  
3 the core data, including BLI kinetic experiments, synthesis of DA probes,  
4 modification site analysis of DAQ to GPX4 protein, proteomics for E3 ligase,  
5 and most of the LC-MS/MS-based phospholipidomics, and thus listed as the  
6 first co-author. XML conducted most of the in vivo experiments and acquired  
7 and analyzed data, including interventions in transgenic mice by virus injection,  
8 behavioral tests, and part of phospholipidomics, and thus listed as the second  
9 co-author. DHL conducted most of the in vivo experiments and acquired and  
10 analyzed data, including behavioral tests and part of phospholipidomics, and  
11 thus listed as the third co-author. MW assisted in conducting in vivo  
12 experiments and acquiring data. KL assisted in conducting in vitro experiments  
13 and acquiring data. SRL assisted in conducting modification site analysis of  
14 DAQ to GPX4 protein. ZQL supervised and assisted in modification site  
15 analysis of DAQ to GPX4 protein. CJZ conducted the preparation of GPX4  
16 recombinant. ZMZ supervised and conducted the preparation of GPX4  
17 recombinant. CYY assisted in conducting in vivo experiments and acquiring  
18 data. MHP assisted in conducting in vivo experiments and acquiring data. HBG  
19 conducted the LC-MS/MS-based experiments and acquired data. JCF  
20 conducted the LC-MS/MS-based experiments and acquired data. YFC  
21 supported the LC-MS platform and consulted regarding the data analysis. FH  
22 supervised and advised the project. WYS conducted the LC-MS/MS-based  
23 experiments and analyzed data. HK supervised and advised the project. YFL  
24 advised the project. WJD designed and advised the project, analyzed and  
25 approved data, prepared all the figures and tables, and wrote the manuscript.  
26 GLJ supervised and advised the project. LZ advised the project and revised the  
27 manuscript. RRH designed and supervised the project, revised and approved  
28 the manuscript.

29

1 **Reference**

- 2 1. He J, Sun C, Li T, Luo Z, Huang L, Song X, et al. A Sensitive and Wide  
3 Coverage Ambient Mass Spectrometry Imaging Method for Functional  
4 Metabolites Based Molecular Histology. *Adv Sci (Weinh)*.  
5 2018;5(11):1800250.

6
